# Supplementary material
Source: PubMed Central journal article supplement (PMC5958614)

Supplemental Table 1. For a collection of parameter sets with weak selection, we determined the exact equilibrium frequency of the drive allele ( $\hat{q}$ ) and compared it to the approximation of equations 8-9. The base parameter set is  $t = 1.0$ ,  $hm = 0.0$ ,  $hf = 0.0$ ,  $sm = 0.02$ ,  $sf = 0.02$ . Other cases below allow one or two parameters to deviated from the base set. Given other parameters, we varied  $\delta$  between the lower and upper bounds for polymorphism (eq 5-6) and then determined the exact and approximate  $\hat{q}$  for each  $\delta$ .

| Parameter set  | $\delta$ | exact | Approx. | deviation |      |
|----------------|----------|-------|---------|-----------|------|
| Base           | 0.502    | 0.100 | 0.100   | 0.00      |      |
|                | 0.504    | 0.200 | 0.200   | 0.00      |      |
|                | 0.506    | 0.301 | 0.300   | 0.00      |      |
|                | 0.508    | 0.401 | 0.400   | 0.00      |      |
|                | 0.510    | 0.503 | 0.500   | 0.00      |      |
|                | 0.512    | 0.604 | 0.600   | 0.00      |      |
|                | 0.514    | 0.707 | 0.700   | 0.01      |      |
|                | 0.516    | 0.811 | 0.800   | 0.01      |      |
|                | 0.518    | 0.915 | 0.900   | 0.02      |      |
| sf=0.04 sm=0   | 0.502    | 0.100 | 0.100   | 0.00      |      |
|                | 0.504    | 0.200 | 0.200   | 0.00      |      |
|                | 0.506    | 0.301 | 0.300   | 0.00      |      |
|                | 0.508    | 0.403 | 0.400   | 0.00      |      |
|                | 0.510    | 0.505 | 0.500   | 0.01      |      |
|                | 0.512    | 0.609 | 0.600   | 0.01      |      |
|                | 0.514    | 0.714 | 0.700   | 0.01      |      |
|                | 0.516    | 0.822 | 0.800   | 0.02      |      |
|                | 0.518    | 0.931 | 0.900   | 0.03      |      |
| sf=0.0 sm=0.04 | 0.502    | 0.104 | 0.104   | 0.00      |      |
|                | 0.504    | 0.208 | 0.208   | 0.00      |      |
|                | 0.506    | 0.313 | 0.311   | 0.00      |      |
|                | 0.508    | 0.417 | 0.414   | 0.00      |      |
|                | 0.510    | 0.521 | 0.515   | 0.01      |      |
|                | 0.513    | 0.625 | 0.616   | 0.01      |      |
|                | 0.515    | 0.729 | 0.714   | 0.01      |      |
|                | 0.517    | 0.833 | 0.812   | 0.02      |      |
|                | 0.519    | 0.938 | 0.907   | 0.03      |      |
|                | h=0.4    | 0.508 | 0.104   | 0.100     | 0.00 |
|                |          | 0.509 | 0.208   | 0.200     | 0.01 |
|                |          | 0.509 | 0.312   | 0.300     | 0.01 |
|                |          | 0.510 | 0.418   | 0.400     | 0.02 |
| 0.510          |          | 0.524 | 0.500   | 0.02      |      |

|       |       |       |       |      |
|-------|-------|-------|-------|------|
|       | 0.510 | 0.631 | 0.600 | 0.03 |
|       | 0.511 | 0.738 | 0.700 | 0.04 |
|       | 0.511 | 0.846 | 0.800 | 0.05 |
|       | 0.512 | 0.955 | 0.900 | 0.06 |
| t=0.5 | 0.512 | 0.099 | 0.099 | 0.00 |
|       | 0.514 | 0.199 | 0.199 | 0.00 |
|       | 0.516 | 0.299 | 0.299 | 0.00 |
|       | 0.518 | 0.400 | 0.398 | 0.00 |
|       | 0.520 | 0.502 | 0.498 | 0.00 |
|       | 0.522 | 0.604 | 0.598 | 0.01 |
|       | 0.524 | 0.706 | 0.699 | 0.01 |
|       | 0.526 | 0.810 | 0.799 | 0.01 |
|       | 0.528 | 0.915 | 0.899 | 0.02 |

Supplemental Table 2. For a collection of parameter sets with selection through male function and meiotic drive held to empirical estimates ( $h_F = h_M = 0$ ,  $s_M = 0.2$ ,  $\delta = 0.58$ ), we determined the exact equilibrium frequency of the drive allele ( $\hat{q}$ ) and compared it to the approximation of equations 8-9. We varied the outcrossing rate ( $t$ ) and the selection coefficient through female function ( $s_F$ ).

| t | sf   | exact | Approx. | deviation |
|---|------|-------|---------|-----------|
| 1 | 0    | 0.722 | 0.800   | -0.08     |
| 1 | 0.01 | 0.699 | 0.766   | -0.07     |
| 1 | 0.02 | 0.677 | 0.735   | -0.06     |
| 1 | 0.03 | 0.655 | 0.706   | -0.05     |
| 1 | 0.04 | 0.634 | 0.679   | -0.04     |
| 1 | 0.05 | 0.614 | 0.654   | -0.04     |
| 1 | 0.06 | 0.595 | 0.630   | -0.03     |
| 1 | 0.07 | 0.577 | 0.608   | -0.03     |
| 1 | 0.08 | 0.559 | 0.587   | -0.03     |
| 1 | 0.09 | 0.542 | 0.568   | -0.03     |
| 1 | 0.1  | 0.526 | 0.549   | -0.02     |
| 1 | 0.11 | 0.511 | 0.532   | -0.02     |
| 1 | 0.12 | 0.496 | 0.516   | -0.02     |
| 1 | 0.13 | 0.482 | 0.501   | -0.02     |
| 1 | 0.14 | 0.469 | 0.486   | -0.02     |
| 1 | 0.15 | 0.457 | 0.472   | -0.02     |
| 1 | 0.16 | 0.445 | 0.459   | -0.01     |
| 1 | 0.17 | 0.433 | 0.447   | -0.01     |
| 1 | 0.18 | 0.422 | 0.435   | -0.01     |
| 1 | 0.19 | 0.412 | 0.424   | -0.01     |
| 1 | 0.2  | 0.402 | 0.414   | -0.01     |
| 1 | 0.21 | 0.392 | 0.404   | -0.01     |
| 1 | 0.22 | 0.383 | 0.394   | -0.01     |
| 1 | 0.23 | 0.374 | 0.385   | -0.01     |
| 1 | 0.24 | 0.366 | 0.376   | -0.01     |
| 1 | 0.25 | 0.358 | 0.368   | -0.01     |
| 1 | 0.26 | 0.350 | 0.360   | -0.01     |
| 1 | 0.27 | 0.343 | 0.352   | -0.01     |
| 1 | 0.28 | 0.336 | 0.344   | -0.01     |
| 1 | 0.29 | 0.329 | 0.337   | -0.01     |
| 1 | 0.3  | 0.322 | 0.330   | -0.01     |
| 1 | 0.31 | 0.316 | 0.324   | -0.01     |

|   |      |       |       |       |
|---|------|-------|-------|-------|
| 1 | 0.32 | 0.310 | 0.318 | -0.01 |
| 1 | 0.33 | 0.304 | 0.312 | -0.01 |
| 1 | 0.34 | 0.298 | 0.306 | -0.01 |
| 1 | 0.35 | 0.293 | 0.300 | -0.01 |
| 1 | 0.36 | 0.288 | 0.295 | -0.01 |
| 1 | 0.37 | 0.283 | 0.289 | -0.01 |
| 1 | 0.38 | 0.278 | 0.284 | -0.01 |
| 1 | 0.39 | 0.273 | 0.279 | -0.01 |
| 1 | 0.4  | 0.269 | 0.275 | -0.01 |
| 1 | 0.41 | 0.264 | 0.270 | -0.01 |
| 1 | 0.42 | 0.260 | 0.266 | -0.01 |
| 1 | 0.43 | 0.256 | 0.261 | -0.01 |
| 1 | 0.44 | 0.252 | 0.257 | -0.01 |
| 1 | 0.45 | 0.248 | 0.253 | -0.01 |
| 1 | 0.46 | 0.244 | 0.249 | -0.01 |
| 1 | 0.47 | 0.240 | 0.246 | -0.01 |
| 1 | 0.48 | 0.237 | 0.242 | -0.01 |
| 1 | 0.49 | 0.233 | 0.238 | 0.00  |
| 1 | 0.5  | 0.230 | 0.235 | 0.00  |
| 1 | 0.51 | 0.227 | 0.232 | 0.00  |
| 1 | 0.52 | 0.224 | 0.228 | 0.00  |
| 1 | 0.53 | 0.220 | 0.225 | 0.00  |
| 1 | 0.54 | 0.217 | 0.222 | 0.00  |
| 1 | 0.55 | 0.215 | 0.219 | 0.00  |
| 1 | 0.56 | 0.212 | 0.216 | 0.00  |
| 1 | 0.57 | 0.209 | 0.213 | 0.00  |
| 1 | 0.58 | 0.206 | 0.210 | 0.00  |
| 1 | 0.59 | 0.204 | 0.208 | 0.00  |
| 1 | 0.6  | 0.201 | 0.205 | 0.00  |
| 1 | 0.61 | 0.199 | 0.202 | 0.00  |
| 1 | 0.62 | 0.196 | 0.200 | 0.00  |
| 1 | 0.63 | 0.194 | 0.198 | 0.00  |
| 1 | 0.64 | 0.191 | 0.195 | 0.00  |
| 1 | 0.65 | 0.189 | 0.193 | 0.00  |
| 1 | 0.66 | 0.187 | 0.191 | 0.00  |
| 1 | 0.67 | 0.185 | 0.188 | 0.00  |
| 1 | 0.68 | 0.183 | 0.186 | 0.00  |
| 1 | 0.69 | 0.181 | 0.184 | 0.00  |
| 1 | 0.7  | 0.179 | 0.182 | 0.00  |
| 1 | 0.71 | 0.177 | 0.180 | 0.00  |
| 1 | 0.72 | 0.175 | 0.178 | 0.00  |
| 1 | 0.73 | 0.173 | 0.176 | 0.00  |
| 1 | 0.74 | 0.171 | 0.174 | 0.00  |

|     |      |       |       |       |
|-----|------|-------|-------|-------|
| 1   | 0.75 | 0.169 | 0.172 | 0.00  |
| 1   | 0.76 | 0.167 | 0.170 | 0.00  |
| 1   | 0.77 | 0.166 | 0.169 | 0.00  |
| 1   | 0.78 | 0.164 | 0.167 | 0.00  |
| 1   | 0.79 | 0.162 | 0.165 | 0.00  |
| 1   | 0.8  | 0.161 | 0.163 | 0.00  |
| 1   | 0.81 | 0.159 | 0.162 | 0.00  |
| 1   | 0.82 | 0.157 | 0.160 | 0.00  |
| 1   | 0.83 | 0.156 | 0.159 | 0.00  |
| 1   | 0.84 | 0.154 | 0.157 | 0.00  |
| 1   | 0.85 | 0.153 | 0.156 | 0.00  |
| 1   | 0.86 | 0.151 | 0.154 | 0.00  |
| 1   | 0.87 | 0.150 | 0.153 | 0.00  |
| 1   | 0.88 | 0.149 | 0.151 | 0.00  |
| 1   | 0.89 | 0.147 | 0.150 | 0.00  |
| 1   | 0.9  | 0.146 | 0.148 | 0.00  |
| 1   | 0.91 | 0.145 | 0.147 | 0.00  |
| 1   | 0.92 | 0.143 | 0.146 | 0.00  |
| 1   | 0.93 | 0.142 | 0.144 | 0.00  |
| 1   | 0.94 | 0.141 | 0.143 | 0.00  |
| 1   | 0.95 | 0.140 | 0.142 | 0.00  |
| 1   | 0.96 | 0.138 | 0.141 | 0.00  |
| 1   | 0.97 | 0.137 | 0.139 | 0.00  |
| 1   | 0.98 | 0.136 | 0.138 | 0.00  |
| 1   | 0.99 | 0.135 | 0.137 | 0.00  |
| 1   | 1    | 0.134 | 0.136 | 0.00  |
| 0.9 | 0    | 0.743 | 0.833 | -0.09 |
| 0.9 | 0.01 | 0.713 | 0.787 | -0.07 |
| 0.9 | 0.02 | 0.683 | 0.745 | -0.06 |
| 0.9 | 0.03 | 0.655 | 0.707 | -0.05 |
| 0.9 | 0.04 | 0.627 | 0.672 | -0.04 |
| 0.9 | 0.05 | 0.601 | 0.640 | -0.04 |
| 0.9 | 0.06 | 0.577 | 0.610 | -0.03 |
| 0.9 | 0.07 | 0.554 | 0.582 | -0.03 |
| 0.9 | 0.08 | 0.532 | 0.557 | -0.03 |
| 0.9 | 0.09 | 0.511 | 0.533 | -0.02 |
| 0.9 | 0.1  | 0.492 | 0.511 | -0.02 |
| 0.9 | 0.11 | 0.473 | 0.491 | -0.02 |
| 0.9 | 0.12 | 0.456 | 0.472 | -0.02 |
| 0.9 | 0.13 | 0.439 | 0.454 | -0.01 |
| 0.9 | 0.14 | 0.424 | 0.437 | -0.01 |
| 0.9 | 0.15 | 0.409 | 0.421 | -0.01 |
| 0.9 | 0.16 | 0.396 | 0.407 | -0.01 |

|     |      |       |       |       |
|-----|------|-------|-------|-------|
| 0.9 | 0.17 | 0.383 | 0.393 | -0.01 |
| 0.9 | 0.18 | 0.370 | 0.380 | -0.01 |
| 0.9 | 0.19 | 0.358 | 0.367 | -0.01 |
| 0.9 | 0.2  | 0.347 | 0.356 | -0.01 |
| 0.9 | 0.21 | 0.337 | 0.344 | -0.01 |
| 0.9 | 0.22 | 0.327 | 0.334 | -0.01 |
| 0.9 | 0.23 | 0.317 | 0.324 | -0.01 |
| 0.9 | 0.24 | 0.308 | 0.314 | -0.01 |
| 0.9 | 0.25 | 0.300 | 0.305 | -0.01 |
| 0.9 | 0.26 | 0.291 | 0.297 | -0.01 |
| 0.9 | 0.27 | 0.284 | 0.288 | 0.00  |
| 0.9 | 0.28 | 0.276 | 0.281 | 0.00  |
| 0.9 | 0.29 | 0.269 | 0.273 | 0.00  |
| 0.9 | 0.3  | 0.262 | 0.266 | 0.00  |
| 0.9 | 0.31 | 0.255 | 0.259 | 0.00  |
| 0.9 | 0.32 | 0.249 | 0.252 | 0.00  |
| 0.9 | 0.33 | 0.243 | 0.246 | 0.00  |
| 0.9 | 0.34 | 0.237 | 0.240 | 0.00  |
| 0.9 | 0.35 | 0.232 | 0.234 | 0.00  |
| 0.9 | 0.36 | 0.226 | 0.228 | 0.00  |
| 0.9 | 0.37 | 0.221 | 0.223 | 0.00  |
| 0.9 | 0.38 | 0.216 | 0.218 | 0.00  |
| 0.9 | 0.39 | 0.211 | 0.213 | 0.00  |
| 0.9 | 0.4  | 0.206 | 0.208 | 0.00  |
| 0.9 | 0.41 | 0.202 | 0.203 | 0.00  |
| 0.9 | 0.42 | 0.198 | 0.199 | 0.00  |
| 0.9 | 0.43 | 0.193 | 0.194 | 0.00  |
| 0.9 | 0.44 | 0.189 | 0.190 | 0.00  |
| 0.9 | 0.45 | 0.186 | 0.186 | 0.00  |
| 0.9 | 0.46 | 0.182 | 0.182 | 0.00  |
| 0.9 | 0.47 | 0.178 | 0.178 | 0.00  |
| 0.9 | 0.48 | 0.175 | 0.175 | 0.00  |
| 0.9 | 0.49 | 0.171 | 0.171 | 0.00  |
| 0.9 | 0.5  | 0.168 | 0.168 | 0.00  |
| 0.9 | 0.51 | 0.164 | 0.164 | 0.00  |
| 0.9 | 0.52 | 0.161 | 0.161 | 0.00  |
| 0.9 | 0.53 | 0.158 | 0.158 | 0.00  |
| 0.9 | 0.54 | 0.155 | 0.155 | 0.00  |
| 0.9 | 0.55 | 0.152 | 0.152 | 0.00  |
| 0.9 | 0.56 | 0.150 | 0.149 | 0.00  |
| 0.9 | 0.57 | 0.147 | 0.146 | 0.00  |
| 0.9 | 0.58 | 0.144 | 0.143 | 0.00  |
| 0.9 | 0.59 | 0.142 | 0.140 | 0.00  |

|     |      |       |       |       |
|-----|------|-------|-------|-------|
| 0.9 | 0.6  | 0.139 | 0.138 | 0.00  |
| 0.9 | 0.61 | 0.137 | 0.135 | 0.00  |
| 0.9 | 0.62 | 0.134 | 0.133 | 0.00  |
| 0.9 | 0.63 | 0.132 | 0.130 | 0.00  |
| 0.9 | 0.64 | 0.130 | 0.128 | 0.00  |
| 0.9 | 0.65 | 0.128 | 0.126 | 0.00  |
| 0.9 | 0.66 | 0.125 | 0.123 | 0.00  |
| 0.9 | 0.67 | 0.123 | 0.121 | 0.00  |
| 0.9 | 0.68 | 0.121 | 0.119 | 0.00  |
| 0.9 | 0.69 | 0.119 | 0.117 | 0.00  |
| 0.9 | 0.7  | 0.117 | 0.115 | 0.00  |
| 0.9 | 0.71 | 0.115 | 0.113 | 0.00  |
| 0.9 | 0.72 | 0.114 | 0.111 | 0.00  |
| 0.9 | 0.73 | 0.112 | 0.109 | 0.00  |
| 0.9 | 0.74 | 0.110 | 0.107 | 0.00  |
| 0.9 | 0.75 | 0.108 | 0.106 | 0.00  |
| 0.9 | 0.76 | 0.107 | 0.104 | 0.00  |
| 0.9 | 0.77 | 0.105 | 0.102 | 0.00  |
| 0.9 | 0.78 | 0.103 | 0.100 | 0.00  |
| 0.9 | 0.79 | 0.102 | 0.099 | 0.00  |
| 0.9 | 0.8  | 0.100 | 0.097 | 0.00  |
| 0.9 | 0.81 | 0.099 | 0.095 | 0.00  |
| 0.9 | 0.82 | 0.097 | 0.094 | 0.00  |
| 0.9 | 0.83 | 0.096 | 0.092 | 0.00  |
| 0.9 | 0.84 | 0.094 | 0.091 | 0.00  |
| 0.9 | 0.85 | 0.093 | 0.089 | 0.00  |
| 0.9 | 0.86 | 0.091 | 0.088 | 0.00  |
| 0.9 | 0.87 | 0.090 | 0.087 | 0.00  |
| 0.9 | 0.88 | 0.089 | 0.085 | 0.00  |
| 0.9 | 0.89 | 0.087 | 0.084 | 0.00  |
| 0.9 | 0.9  | 0.086 | 0.083 | 0.00  |
| 0.9 | 0.91 | 0.085 | 0.081 | 0.00  |
| 0.9 | 0.92 | 0.084 | 0.080 | 0.00  |
| 0.9 | 0.93 | 0.082 | 0.079 | 0.00  |
| 0.9 | 0.94 | 0.081 | 0.077 | 0.00  |
| 0.9 | 0.95 | 0.080 | 0.076 | 0.00  |
| 0.9 | 0.96 | 0.079 | 0.075 | 0.00  |
| 0.9 | 0.97 | 0.078 | 0.074 | 0.00  |
| 0.9 | 0.98 | 0.077 | 0.073 | 0.00  |
| 0.9 | 0.99 | 0.075 | 0.072 | 0.00  |
| 0.9 | 1    | 0.074 | 0.070 | 0.00  |
| 0.8 | 0    | 0.769 | 0.875 | -0.11 |
| 0.8 | 0.01 | 0.728 | 0.812 | -0.08 |

|     |      |       |       |       |
|-----|------|-------|-------|-------|
| 0.8 | 0.02 | 0.688 | 0.755 | -0.07 |
| 0.8 | 0.03 | 0.650 | 0.704 | -0.05 |
| 0.8 | 0.04 | 0.614 | 0.658 | -0.04 |
| 0.8 | 0.05 | 0.581 | 0.617 | -0.04 |
| 0.8 | 0.06 | 0.549 | 0.580 | -0.03 |
| 0.8 | 0.07 | 0.520 | 0.546 | -0.03 |
| 0.8 | 0.08 | 0.493 | 0.515 | -0.02 |
| 0.8 | 0.09 | 0.467 | 0.486 | -0.02 |
| 0.8 | 0.1  | 0.444 | 0.460 | -0.02 |
| 0.8 | 0.11 | 0.422 | 0.436 | -0.01 |
| 0.8 | 0.12 | 0.401 | 0.414 | -0.01 |
| 0.8 | 0.13 | 0.382 | 0.393 | -0.01 |
| 0.8 | 0.14 | 0.364 | 0.374 | -0.01 |
| 0.8 | 0.15 | 0.348 | 0.356 | -0.01 |
| 0.8 | 0.16 | 0.332 | 0.340 | -0.01 |
| 0.8 | 0.17 | 0.318 | 0.324 | -0.01 |
| 0.8 | 0.18 | 0.304 | 0.310 | -0.01 |
| 0.8 | 0.19 | 0.291 | 0.296 | -0.01 |
| 0.8 | 0.2  | 0.279 | 0.283 | 0.00  |
| 0.8 | 0.21 | 0.267 | 0.271 | 0.00  |
| 0.8 | 0.22 | 0.256 | 0.260 | 0.00  |
| 0.8 | 0.23 | 0.246 | 0.249 | 0.00  |
| 0.8 | 0.24 | 0.237 | 0.239 | 0.00  |
| 0.8 | 0.25 | 0.227 | 0.229 | 0.00  |
| 0.8 | 0.26 | 0.219 | 0.220 | 0.00  |
| 0.8 | 0.27 | 0.210 | 0.211 | 0.00  |
| 0.8 | 0.28 | 0.202 | 0.203 | 0.00  |
| 0.8 | 0.29 | 0.195 | 0.195 | 0.00  |
| 0.8 | 0.3  | 0.188 | 0.188 | 0.00  |
| 0.8 | 0.31 | 0.181 | 0.180 | 0.00  |
| 0.8 | 0.32 | 0.174 | 0.173 | 0.00  |
| 0.8 | 0.33 | 0.168 | 0.167 | 0.00  |
| 0.8 | 0.34 | 0.162 | 0.161 | 0.00  |
| 0.8 | 0.35 | 0.156 | 0.155 | 0.00  |
| 0.8 | 0.36 | 0.151 | 0.149 | 0.00  |
| 0.8 | 0.37 | 0.146 | 0.143 | 0.00  |
| 0.8 | 0.38 | 0.140 | 0.138 | 0.00  |
| 0.8 | 0.39 | 0.136 | 0.133 | 0.00  |
| 0.8 | 0.4  | 0.131 | 0.128 | 0.00  |
| 0.8 | 0.41 | 0.126 | 0.123 | 0.00  |
| 0.8 | 0.42 | 0.122 | 0.119 | 0.00  |
| 0.8 | 0.43 | 0.118 | 0.114 | 0.00  |
| 0.8 | 0.44 | 0.114 | 0.110 | 0.00  |



|     |      |       |       |      |
|-----|------|-------|-------|------|
| 0.8 | 0.45 | 0.110 | 0.106 | 0.00 |
| 0.8 | 0.46 | 0.106 | 0.102 | 0.00 |
| 0.8 | 0.47 | 0.102 | 0.098 | 0.00 |
| 0.8 | 0.48 | 0.099 | 0.094 | 0.00 |
| 0.8 | 0.49 | 0.096 | 0.091 | 0.00 |
| 0.8 | 0.5  | 0.092 | 0.087 | 0.00 |
| 0.8 | 0.51 | 0.089 | 0.084 | 0.01 |
| 0.8 | 0.52 | 0.086 | 0.081 | 0.01 |
| 0.8 | 0.53 | 0.083 | 0.077 | 0.01 |
| 0.8 | 0.54 | 0.080 | 0.074 | 0.01 |
| 0.8 | 0.55 | 0.077 | 0.071 | 0.01 |
| 0.8 | 0.56 | 0.074 | 0.069 | 0.01 |
| 0.8 | 0.57 | 0.072 | 0.066 | 0.01 |
| 0.8 | 0.58 | 0.069 | 0.063 | 0.01 |
| 0.8 | 0.59 | 0.067 | 0.060 | 0.01 |
| 0.8 | 0.6  | 0.064 | 0.058 | 0.01 |
| 0.8 | 0.61 | 0.062 | 0.055 | 0.01 |
| 0.8 | 0.62 | 0.060 | 0.053 | 0.01 |
| 0.8 | 0.63 | 0.057 | 0.051 | 0.01 |
| 0.8 | 0.64 | 0.055 | 0.048 | 0.01 |
| 0.8 | 0.65 | 0.053 | 0.046 | 0.01 |
| 0.8 | 0.66 | 0.051 | 0.044 | 0.01 |
| 0.8 | 0.67 | 0.049 | 0.042 | 0.01 |
| 0.8 | 0.68 | 0.047 | 0.040 | 0.01 |
| 0.8 | 0.69 | 0.045 | 0.038 | 0.01 |
| 0.8 | 0.7  | 0.043 | 0.036 | 0.01 |
| 0.8 | 0.71 | 0.041 | 0.034 | 0.01 |
| 0.8 | 0.72 | 0.039 | 0.032 | 0.01 |
| 0.8 | 0.73 | 0.038 | 0.030 | 0.01 |
| 0.8 | 0.74 | 0.036 | 0.028 | 0.01 |
| 0.8 | 0.75 | 0.034 | 0.026 | 0.01 |
| 0.8 | 0.76 | 0.033 | 0.025 | 0.01 |
| 0.8 | 0.77 | 0.031 | 0.023 | 0.01 |
| 0.8 | 0.78 | 0.029 | 0.021 | 0.01 |
| 0.8 | 0.79 | 0.028 | 0.020 | 0.01 |
| 0.8 | 0.8  | 0.026 | 0.018 | 0.01 |
| 0.8 | 0.81 | 0.025 | 0.017 | 0.01 |
| 0.8 | 0.82 | 0.024 | 0.015 | 0.01 |
| 0.8 | 0.83 | 0.022 | 0.014 | 0.01 |
| 0.8 | 0.84 | 0.021 | 0.012 | 0.01 |
| 0.8 | 0.85 | 0.019 | 0.011 | 0.01 |
| 0.8 | 0.86 | 0.018 | 0.009 | 0.01 |
| 0.8 | 0.87 | 0.017 | 0.008 | 0.01 |

|     |      |       |        |      |
|-----|------|-------|--------|------|
| 0.8 | 0.88 | 0.016 | 0.007  | 0.01 |
| 0.8 | 0.89 | 0.014 | 0.005  | 0.01 |
| 0.8 | 0.9  | 0.013 | 0.004  | 0.01 |
| 0.8 | 0.91 | 0.012 | 0.003  | 0.01 |
| 0.8 | 0.92 | 0.011 | 0.002  | 0.01 |
| 0.8 | 0.93 | 0.010 | 0.000  | 0.01 |
| 0.8 | 0.94 | 0.008 | -0.001 | 0.01 |
| 0.8 | 0.95 | 0.007 | -0.002 | 0.01 |
| 0.8 | 0.96 | 0.006 | -0.003 | 0.01 |
| 0.8 | 0.97 | 0.005 | -0.004 | 0.01 |
| 0.8 | 0.98 | 0.004 | -0.005 | 0.01 |
| 0.8 | 0.99 | 0.003 | -0.006 | 0.01 |
| 0.8 | 1    | 0.002 | -0.007 | 0.01 |

Supplemental Figure 1. The equilibrium frequency of the drive allele ( $\hat{q}$ ) from equations 8-9 is depicted on the y-axis as a function of (top) the selection coefficient through female function ( $s_F$ ) and (bottom) the selection coefficient through female function ( $s_M$ ). The three trajectories denote  $t = 1.0$  (blue),  $t = 0.9$  (yellow), and  $t = 0.8$  (green). We also assume  $h_F = h_M = 0$  and  $\delta = 0.58$ .

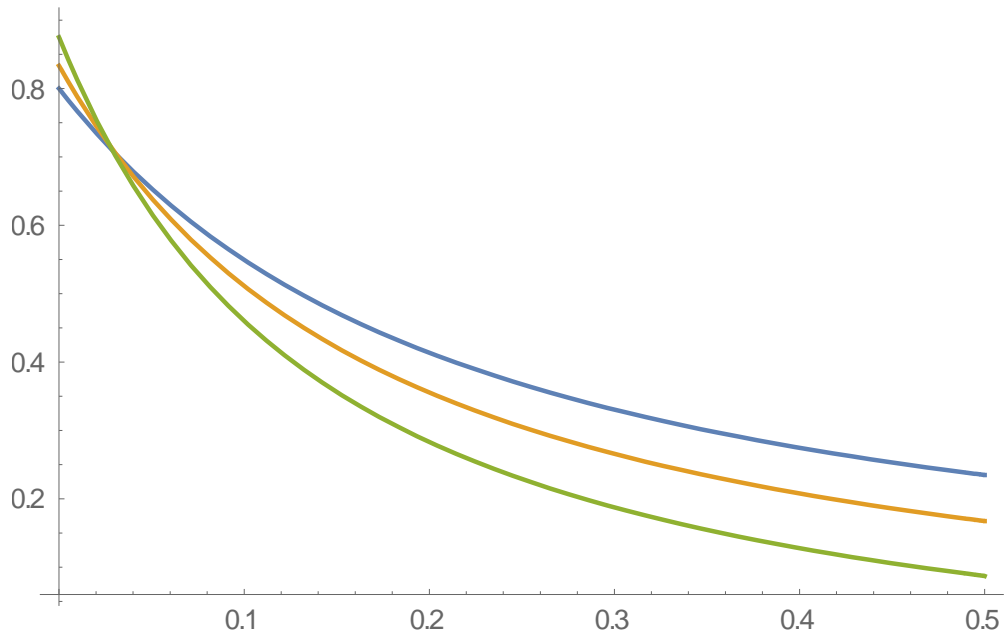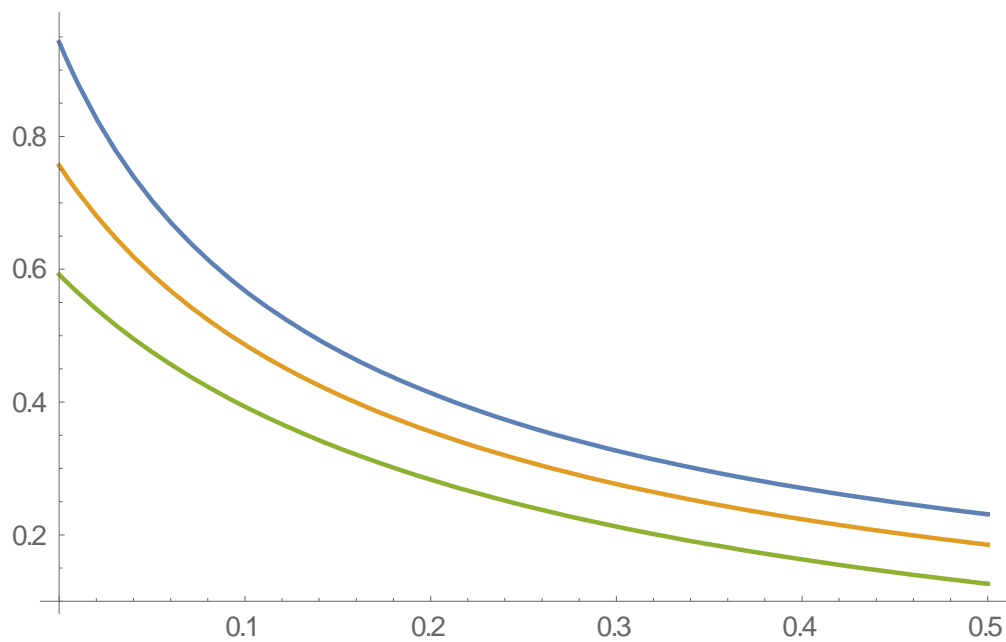

Supplement: NIHMS964743-supplement-supp.pdf [file NIHMS964743-supplement-supp.pdf]
